# Supplementary material for: O-Antigen Protects Gram-Negative Bacteria from Histone Killing
Source: PubMed Central journal article supplement (PMC3738592; doi:10.1371/journal.pone.0071097), 2013-08-08

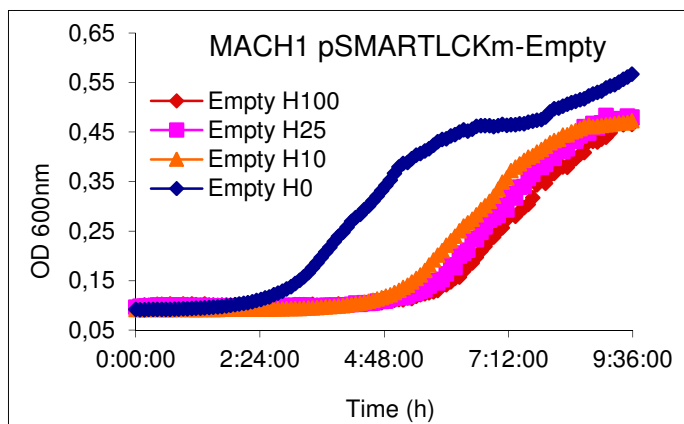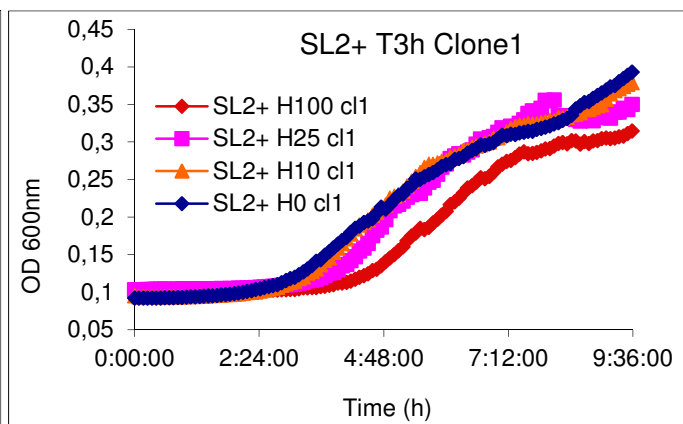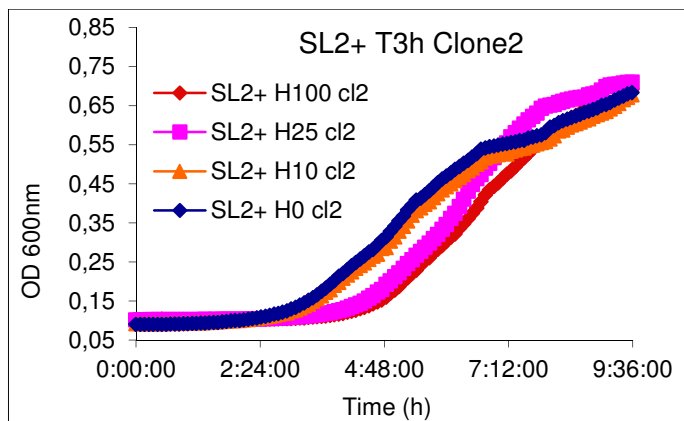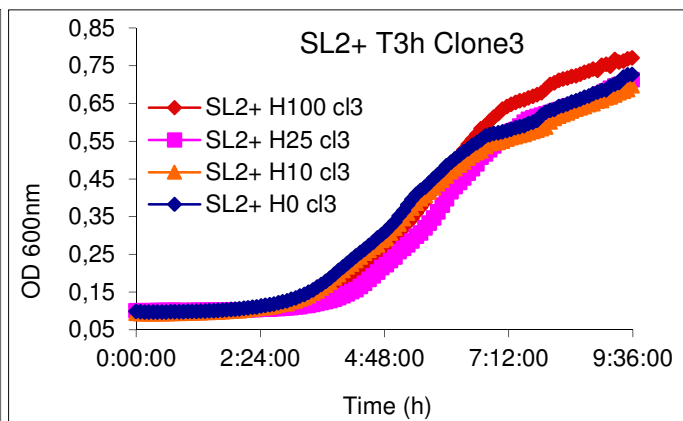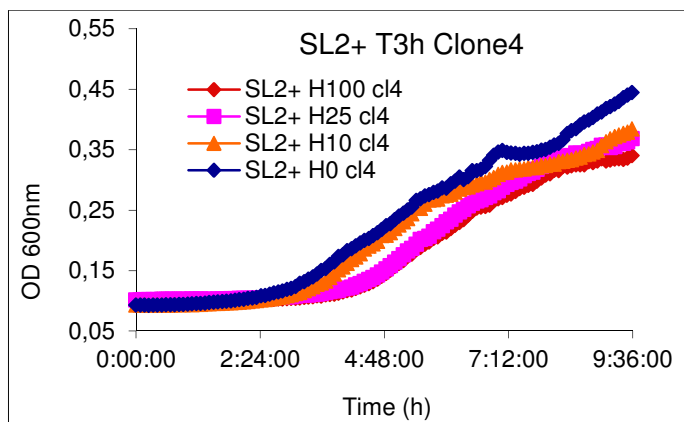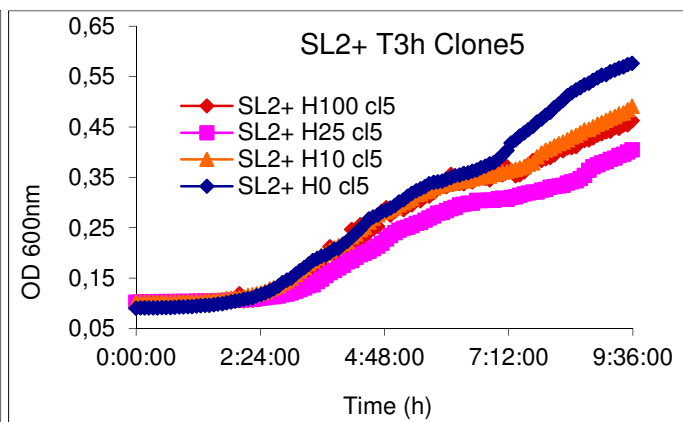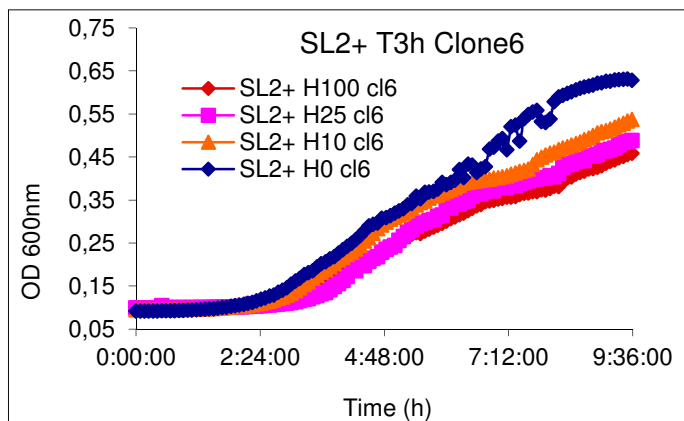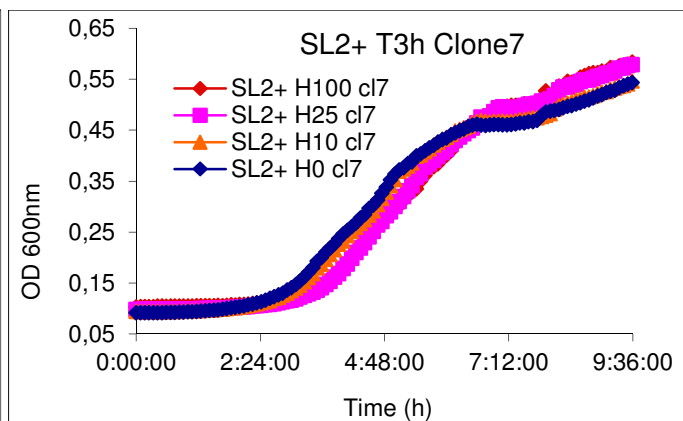

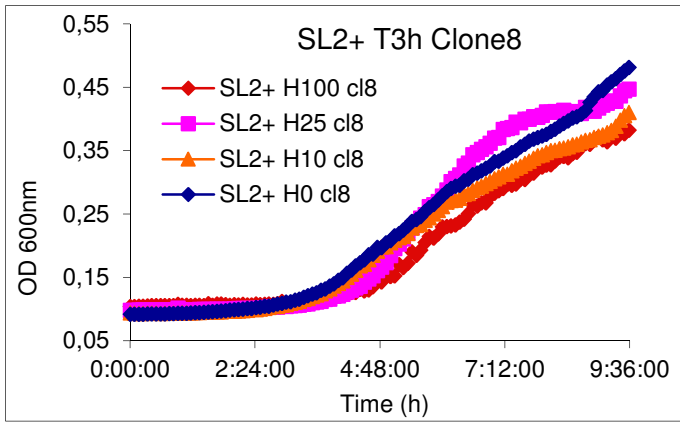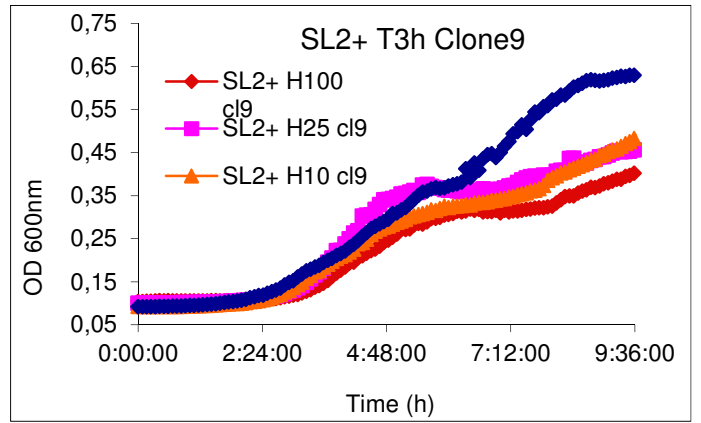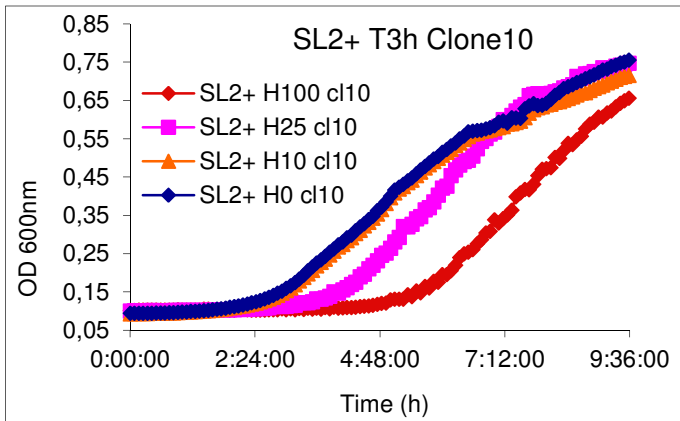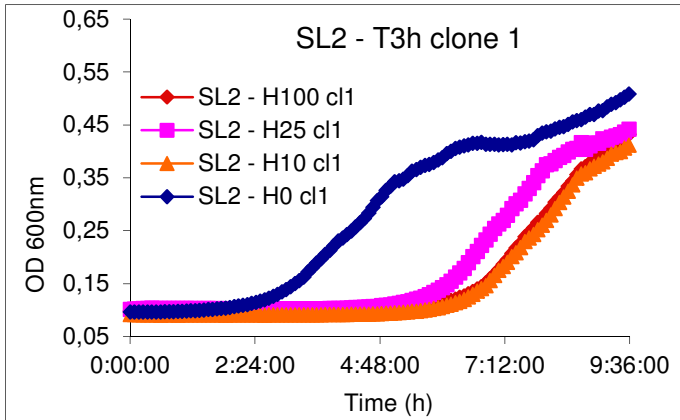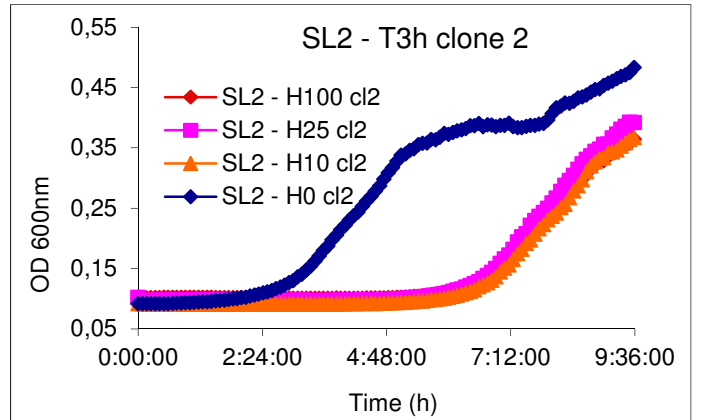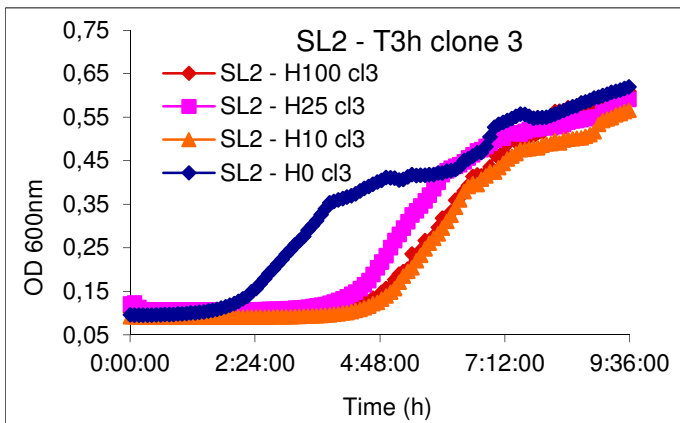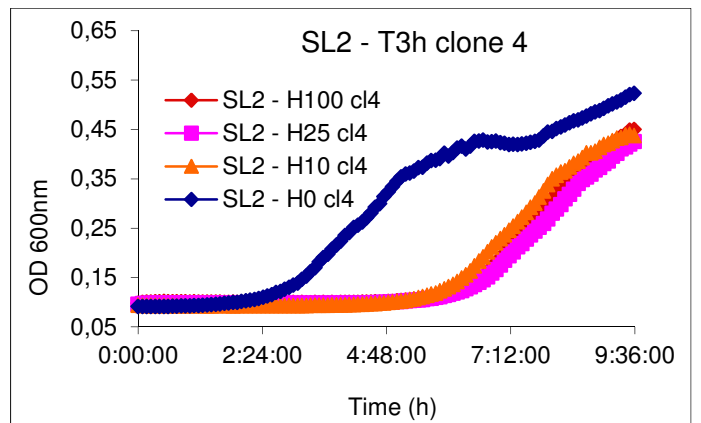

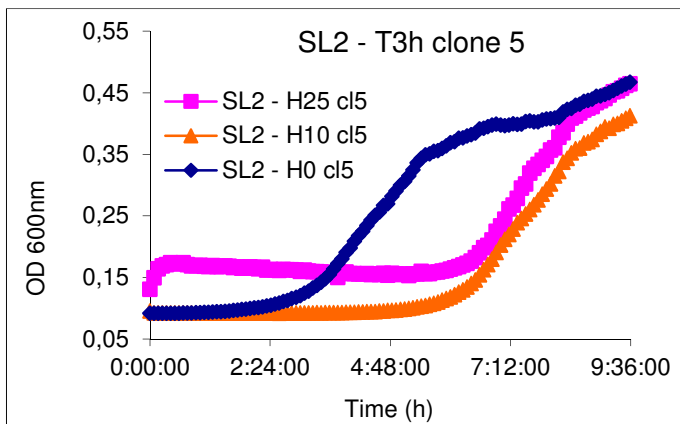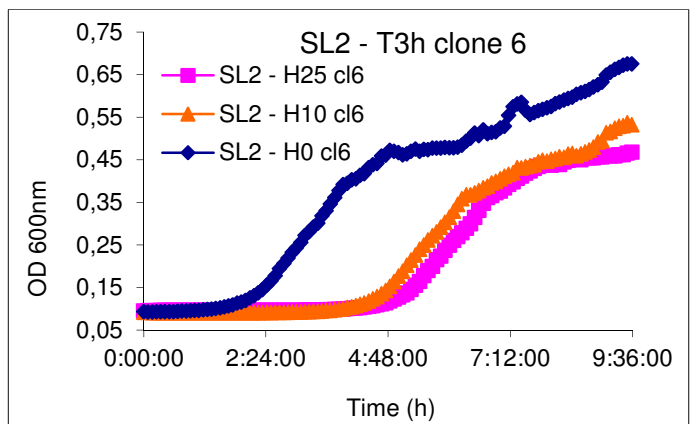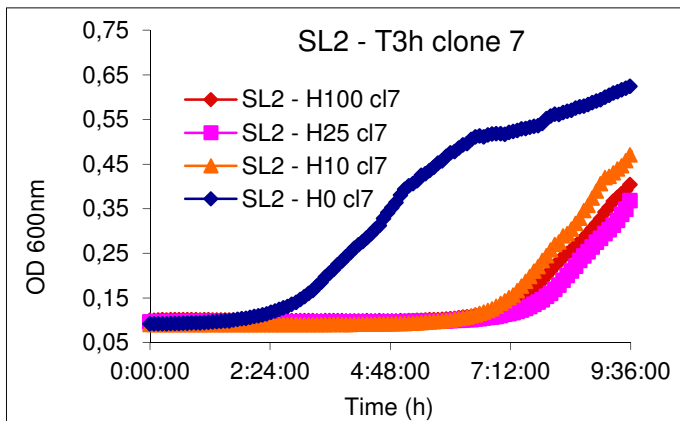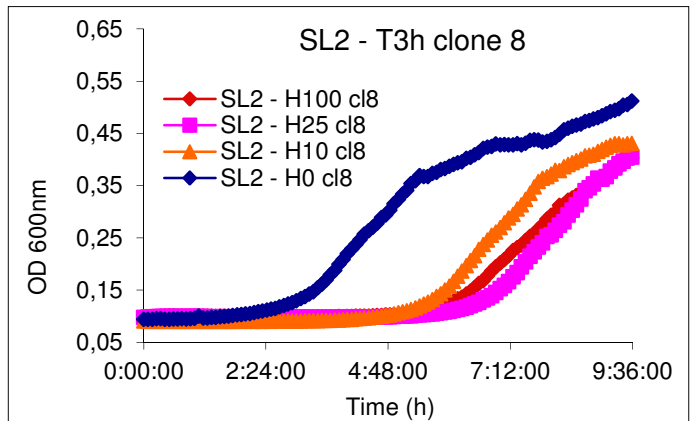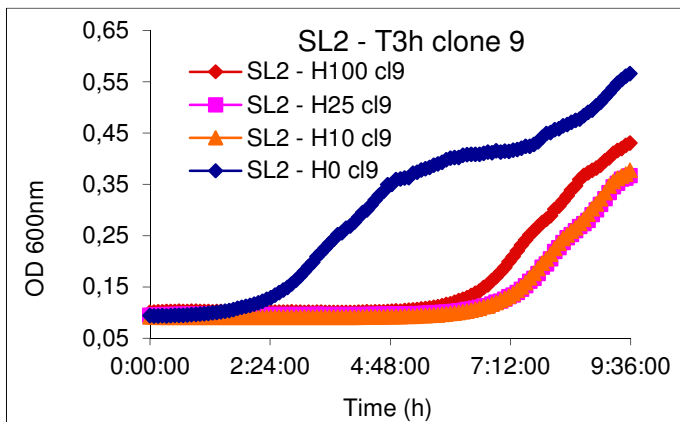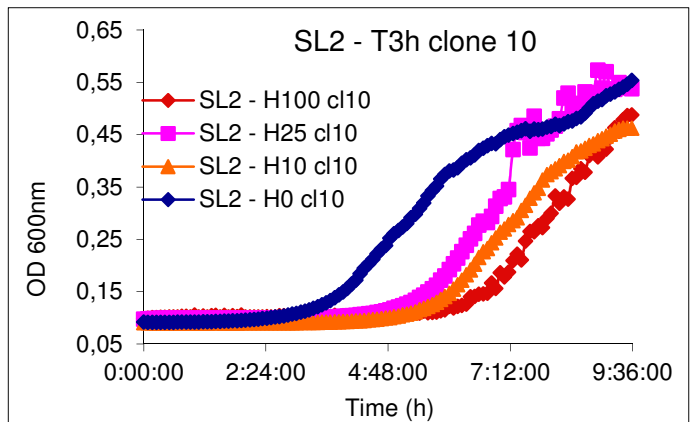

Supplement: pone.0071097.s001.pdf [file pone.0071097.s001.pdf]
